# Supplementary material for: The Toxicity of Wiped Dust and Airborne Microbes in Individual Classrooms Increase the Risk of Teachers’ Work-Related Symptoms: A Cross-Sectional Study
Source: MDPI journal article supplement (doi:10.3390/pathogens10111360), 2021-10-21
Supplement: s1 [file s1]

# Supplementary material

**Table S1.** The results of the crude logistic regression models for the impact of increased toxicity levels of wiped dust in the classroom on work-related symptoms.

|                                                | EC <sub>50</sub> ≥ 25<br>μg mL <sup>-1</sup> | Crude OR (95% CI)                       |                                          |
|------------------------------------------------|----------------------------------------------|-----------------------------------------|------------------------------------------|
|                                                |                                              | EC <sub>50</sub> 12 μg mL <sup>-1</sup> | EC <sub>50</sub> ≤ 6 μg mL <sup>-1</sup> |
| GENERAL SYMPTOMS                               |                                              |                                         |                                          |
| Fatigue                                        | 1                                            | 1.02 (0.44,2.35)                        | 2.86 (0.95,8.64)                         |
| Headache                                       | 1                                            | 1.01 (0.41,2.49)                        | 1.56 (0.45,5.38)                         |
| Fever                                          | 1                                            | 2.77 (0.54,14.3)                        | 2.57 (0.25,26.4)                         |
| Chills                                         | 1                                            | 1.36 (0.39,4.76)                        | 0.92 (0.11,7.91)                         |
| Generalized feeling of sickness                | 1                                            | 0.97 (0.37,2.50)                        | 3.23 (1.03,10.1)                         |
| Decreased physical condition                   | 1                                            | 1.06 (0.31,3.59)                        | 3.67 (0.99,13.7)                         |
| Indefinite feeling of thermoregulation failure | 1                                            | 0.57 (0.12,2.74)                        | 2.83 (0.67,11.9)                         |
| RESPIRATORY SYMPTOMS                           |                                              |                                         |                                          |
| Nose stuffiness                                | 1                                            | 1.53 (0.68,3.45)                        | 3.35 (1.10,10.2)                         |
| Nose dryness                                   | 1                                            | 1.44 (0.63,3.30)                        | 1.01 (0.26,3.90)                         |
| Nose stinging                                  | 1                                            | 0.65 (0.07,6.01)                        | 1.91 (0.20,18.3)                         |
| Bloody nasal discharge                         | 1                                            | 2.82 (0.67,11.8)                        | 1.91 (0.20,18.3)                         |
| Runny nose                                     | 1                                            | 4.02 (1.46,11.1)                        | 6.44 (1.77,23.4)                         |
| Sneezing                                       | 1                                            | 1.11 (0.42,2.89)                        | 2.01 (0.57,7.06)                         |
| Mouth dryness                                  | 1                                            | 1.68 (0.57,4.96)                        | 2.52 (0.61,10.5)                         |
| Hoarseness                                     | 1                                            | 2.98 (1.35,6.60)                        | 5.53 (1.79,17.1)                         |
| Sore throat                                    | 1                                            | 0.64 (0.13,3.16)                        | 3.22 (0.75,13.8)                         |
| Wheezing                                       | 1                                            | 2.68 (0.16,43.9)                        | 2.68 (0.16,43.9)                         |
| Shortness of breath                            | 1                                            | 3.79 (0.81,17.7)                        | 9.00 (1.63,49.6)                         |
| Asthma attacks                                 | 1                                            | 5.50 (0.49,62.3)                        | 16.9 (1.43,200)                          |
| Dry cough                                      | 1                                            | 1.89 (0.75,4.77)                        | 4.62 (1.43,15.0)                         |
| Pressure in the cheek                          | 1                                            | 0.31 (0.04,2.59)                        | 1.98 (0.38,10.3)                         |
| Globus sensation                               | 1                                            | 1.06 (0.20,5.69)                        | 7.71 (1.80,33.0)                         |
| Throat mucus                                   | 1                                            | 2.11 (0.88,5.02)                        | 6.79 (2.16,21.3)                         |
| Throat itching                                 | 1                                            | 1.82 (0.65,5.06)                        | 4.55 (1.31,15.7)                         |
| DERMAL SYMPTOMS                                |                                              |                                         |                                          |
| Skin dryness                                   | 1                                            | 0.63 (0.17,2.37)                        | 0.59 (0.07,4.89)                         |
| Exanthema                                      | 1                                            | 2.68 (0.16,43.9)                        | 7.86 (0.47,132)                          |
| Pruritus                                       | 1                                            | 0.43 (0.05,3.66)                        | 1.25 (0.14,11.2)                         |
| EYE SYMPTOMS                                   |                                              |                                         |                                          |
| Eye irritation                                 | 1                                            | 1.02 (0.34,3.06)                        | 2.74 (0.76,9.88)                         |
| Wet eyes                                       | 1                                            | 2.77 (0.54,14.3)                        | 5.54 (0.85,36.3)                         |
| Dry eyes                                       | 1                                            | 0.81 (0.30,2.18)                        | 1.76 (0.51,6.12)                         |
| Swollen eyelids                                | 1                                            | 0.65 (0.07,6.01)                        | 1.91 (0.20,18.3)                         |
| Red eyes                                       | 1                                            | 0.43 (0.05,3.66)                        | 1.25 (0.14,11.2)                         |
| Eye discharge                                  | 1                                            | 0.88 (0.09,8.68)                        | 5.54 (0.85,36.3)                         |
| HEARING SYMPTOMS                               |                                              |                                         |                                          |
| Difficulty distinguishing speech in noise      | 1                                            | 0.17 (0.02,1.33)                        | 1.73 (0.43,6.91)                         |
| Hypersensitivity to sound                      | 1                                            | N.D.                                    | 6.36 (1.55,26.0)                         |
| SLEEPING SYMPTOMS                              |                                              |                                         |                                          |
| Insomnia                                       | 1                                            | 1.11 (0.37,3.38)                        | 2.06 (0.51,8.36)                         |
| Difficulty falling asleep                      | 1                                            | 1.19 (0.35,4.10)                        | 5.67 (1.59,20.2)                         |
| Increased need for sleep                       | 1                                            | 0.22 (0.03,1.77)                        | 6.06 (1.81,20.2)                         |

|                             |   |                  |                  |
|-----------------------------|---|------------------|------------------|
| MENTAL SYMPTOMS             |   |                  |                  |
| Difficulty concentrating    | 1 | N.D.             | 3.89 (0.33,45.7) |
| Mental irritability         | 1 | 0.87 (0.26,2.86) | 2.06 (0.51,8.36) |
| Decreased stress resistance | 1 | 1.36 (0.39,4.76) | 3.22 (0.75,13.8) |
| BUILDING-RELATED DISEASES   |   |                  |                  |
| Asthma                      | 1 | 1.53 (0.48,4.87) | 1.74 (0.34,8.96) |
| Allergic rhinitis           | 1 | 0.86 (0.29,2.55) | 2.33 (0.66,8.26) |

The results are presented as odds ratios (ORs) with 95% confidence intervals (CIs).  
N.D., not definable

**Table S2.** The results of the crude logistic regression models for the impact of toxicity of airborne microbes in the classroom on work-related symptoms.

|                                                | Crude OR (95% CI)                        |
|------------------------------------------------|------------------------------------------|
|                                                | EC <sub>50</sub> ≤12 µg mL <sup>-1</sup> |
| GENERAL SYMPTOMS                               |                                          |
| Fatigue                                        | 1.61 (0.86,3.01)                         |
| Headache                                       | 2.08 (1.02,4.25)                         |
| Fever                                          | 2.23 (0.36,13.7)                         |
| Chills                                         | 1.15 (0.41,3.21)                         |
| Generalized feeling of sickness                | 1.95 (0.95,4.00)                         |
| Decreased physical condition                   | 1.69 (0.71,4.05)                         |
| Indefinite feeling of thermoregulation failure | 1.98 (0.71,5.56)                         |
| RESPIRATORY SYMPTOMS                           |                                          |
| Nose stuffiness                                | 1.96 (1.03,3.73)                         |
| Nose dryness                                   | 2.07 (1.04,4.11)                         |
| Nose stinging <sup>a</sup>                     | N.D.                                     |
| Bloody nasal discharge                         | 2.14 (0.65,6.99)                         |
| Runny nose                                     | 1.69 (0.78,3.65)                         |
| Sneezing                                       | 1.33 (0.61,2.91)                         |
| Mouth dryness                                  | 2.21 (0.96,5.10)                         |
| Hoarseness                                     | 2.07 (1.10,3.91)                         |
| Sore throat                                    | 2.75 (1.14,6.64)                         |
| Wheezing <sup>a</sup>                          | N.D.                                     |
| Shortness of breath                            | 4.64 (0.91,23.6)                         |

|                                           |                  |
|-------------------------------------------|------------------|
| Asthma attacks                            | 2.96 (0.26,33.2) |
| Dry cough                                 | 1.11 (0.53,2.33) |
| Pressure in the cheek                     | 2.23 (0.81,6.14) |
| Globus sensation                          | 1.98 (0.71,5.56) |
| Throat mucus                              | 1.94 (0.98,3.84) |
| Throat itching                            | 1.84 (0.82,4.10) |
| DERMAL SYMPTOMS                           |                  |
| Skin dryness                              | 3.55 (1.18,10.6) |
| Exanthema <sup>a</sup>                    | N.D.             |
| Pruritus                                  | 0.97 (0.26,3.55) |
| EYE SYMPTOMS                              |                  |
| Eye irritation                            | 2.10 (1.00,4.44) |
| Wet eyes                                  | 2.82 (0.91,8.77) |
| Dry eyes                                  | 1.82 (0.91,3.67) |
| Swollen eyelids                           | 2.52 (0.59,10.8) |
| Red eyes                                  | 3.25 (1.16,9.05) |
| Eye discharge                             | 8.17 (1.74,38.4) |
| HEARING SYMPTOMS                          |                  |
| Difficulty distinguishing speech in noise | 1.42 (0.63,3.21) |
| Hypersensitivity to sound                 | 0.71 (0.21,2.46) |
| SLEEPING SYMPTOMS                         |                  |
| Insomnia                                  | 1.90 (0.75,4.83) |
| Difficulty falling asleep                 | 2.93 (1.04,8.29) |
| Increased need for sleep                  | 4.01 (1.21,13.3) |
| MENTAL SYMPTOMS                           |                  |
| Difficulty concentrating                  | 1.47 (0.20,10.6) |
| Mental irritability                       | 1.15 (0.41,3.21) |
| Decreased stress resistance               | 1.10 (0.37,3.30) |
| BUILDING-RELATED DISEASES                 |                  |

|                   |                  |
|-------------------|------------------|
| Asthma            | 1.35 (0.52,3.49) |
| Allergic rhinitis | 1.54 (0.68,3.53) |

The results are presented as odds ratios (ORs) with 95% confidence intervals (CIs).

N.D., not definable

<sup>a</sup> These symptoms were not reported by teachers in the group of non-toxic microbes, so OR could not be calculated.
